# Supplementary material
Source: publisher figshare collection journal article supplement (https://brill.figshare.com/ndownloader/files/24847826)
Supplement: Supplementary file 1 [file 24847826]

Population	Predation_level	Group_size	Mean_SBL	Time_to_decision_zone	Time_in_decision_zone
Arima	High	2	3.806633044	45	9
Arima	High	8	2.962738674	14	6
Arima	High	4	3.248503981	18	4
Arima	High	2	2.480877606	33	4
Arima	High	4	1.83707015	16	4
Arima	High	8	2.155667216	10	2
Arima	High	8	2.768098126	13	3
Arima	High	2	3.005401137	20	2
Arima	High	4	2.418230981	23	4
Arima	High	8	3.497297329	9	2
Arima	High	2	3.160416251	9	4
Arima	High	4	3.197676524	7	15
Arima	High	2	2.671557676	7	2
Arima	High	4	2.721717605	5	5
Arima	High	8	2.787237101	10	4
Arima	High	2	2.852748591	43	3
Arima	High	4	3.39600528	10	2
Arima	High	8	2.963978323	5	3
Arima	High	2	1.790002275	7	3
Arima	High	4	1.942556714	17	2
Arima	High	8	2.191922705	7	2
Arima	High	4	3.875086596	32	3
Arima	High	8	3.445228694	6	4
Arima	High	2	3.343393071	102	10
Arima	High	2	3.304443757	19	2
Arima	High	8	3.214389645	21	3
Arima	High	4	3.079956864	12	3
Arima	High	4	2.483847992	6	3
Arima	High	8	2.612576373	14	2
Arima	High	2	2.90389555	11	1
Lower guanapo	High	4	2.541536504	32	6
Lower guanapo	High	8	2.552088105	13	3
Lower guanapo	High	2	2.232422949	40	7
Lower guanapo	High	4	2.709230099	34	3
Lower guanapo	High	2	2.488390351	30	13
Lower guanapo	High	8	2.535084191	19	3
Lower guanapo	High	2	2.182301909	4	3
Lower guanapo	High	8	2.20038065	26	11
Lower guanapo	High	4	2.151668131	18	5
Lower guanapo	High	4	2.031721849	19	3
Lower guanapo	High	2	2.372144457	22	3
Lower guanapo	High	8	2.046699172	4	4
Lower guanapo	High	4	2.283318244	16	3
Lower guanapo	High	8	2.137337142	9	8
Lower guanapo	High	2	2.247406322	17	8
Lower guanapo	High	4	1.946510855	21	4
Lower guanapo	High	2	1.904181847	0	6
Lower guanapo	High	8	1.826653087	12	2
Lower guanapo	High	8	2.033505753	9	4
Lower guanapo	High	2	2.105486808	11	6
Lower guanapo	High	4	1.933299839	7	4
Lower guanapo	High	8	2.131453296	6	3
Lower guanapo	High	4	2.013473334	28	4
Lower guanapo	High	2	1.714814427	2	9
Lower guanapo	High	8	1.624436641	12	6
Lower guanapo	High	2	1.921064961	5	6
Lower guanapo	High	4	1.477223199	1	9
Lower lopinot	High	8	2.251280687	27	8
Lower lopinot	High	2	1.664403889	8	4
Lower lopinot	High	4	2.252829514	24	4
Lower lopinot	High	4	2.851559351	18	7
Lower lopinot	High	8	2.763997073	22	7
Lower lopinot	High	2	2.802668289	39	6
Lower lopinot	High	4	2.182516024	14	11
Lower lopinot	High	8	2.170971646	27	5
Lower lopinot	High	2	2.198056063	13	3
Lower lopinot	High	2	2.484352232	10	9
Lower lopinot	High	8	2.254876717	10	3
Lower lopinot	High	4	2.170529147	16	4
Lower lopinot	High	2	2.285212201	22	10
Lower lopinot	High	8	2.41504638	13	5
Lower lopinot	High	4	2.222285656	22	6
Lower lopinot	High	8	3.096848936	8	6
Lower lopinot	High	4	3.593720691	8	4
Lower lopinot	High	2	3.363271088	26	9
Lower lopinot	High	2	2.867724797	14	6
Lower lopinot	High	8	2.728551006	10	5
Lower lopinot	High	4	2.919103211	16	4
Lower lopinot	High	8	2.771968992	6	4
Lower lopinot	High	4	2.510036455	26	5
Lower lopinot	High	2	2.222514972	24	2
Lower lopinot	High	4	2.959147222	12	5
Lower lopinot	High	2	3.281158135	16	4
Lower lopinot	High	8	3.046665488	9	3
Lower lopinot	High	4	2.522553218	11	3
Lower lopinot	High	2	2.493220835	21	2
Lower lopinot	High	8	2.680607116	14	7
Paria	Low	2	2.859813703	36	38
Paria	Low	8	3.114548593	28	8
Paria	Low	4	2.717579205	41	13
Paria	Low	4	3.948398587	30	14
Paria	Low	8	3.951045749	32	11
Paria	Low	2	3.632857667	300	33
Paria	Low	4	3.591904443	42	17
Paria	Low	2	3.295655668	284	176
Paria	Low	8	3.280268108	22	11
Paria	Low	4	1.850142302	113	20
Paria	Low	2	2.379935965	131	6
Paria	Low	8	2.370495101	39	9
Paria	Low	8	2.355592761	38	6
Paria	Low	4	2.108988208	46	7
Paria	Low	2	2.563188757	53	7
Paria	Low	2	3.01737716	68	10
Paria	Low	4	2.973744764	31	10
Paria	Low	8	2.722470887	23	6
Paria	Low	8	2.425988446	22	11
Paria	Low	4	2.181261444	56	13
Paria	Low	2	1.919643506	91	13
Paria	Low	8	2.103212516	27	8
Paria	Low	2	1.956607333	136	9
Tacarigua	High	8	2.240951904	40	6
Tacarigua	High	2	1.059587887	61	2
Tacarigua	High	4	2.01873357	24	15
Tacarigua	High	4	2.513303861	27	5
Tacarigua	High	8	2.257320514	16	2
Tacarigua	High	2	2.390100758	49	3
Tacarigua	High	4	1.504400287	30	7
Tacarigua	High	8	1.562209495	30	3
Tacarigua	High	2	1.720007015	45	6
Tacarigua	High	8	1.745202679	34	5
Tacarigua	High	4	1.753915958	23	21
Tacarigua	High	2	2.342385492	40	5
Tacarigua	High	2	1.155778034	40	5
Tacarigua	High	8	1.631435247	22	3
Tacarigua	High	4	1.97085544	27	5
Tacarigua	High	8	2.402342464	46	8
Tacarigua	High	2	2.751018724	36	4
Tacarigua	High	4	2.515634036	56	17
Tacarigua	High	8	1.748004233	30	14
Tacarigua	High	2	1.490686171	53	6
Tacarigua	High	4	0.947581125	31	3
Tacarigua	High	4	2.133586061	32	10
Tacarigua	High	8	2.258590375	27	3
Tacarigua	High	2	2.420814347	59	6
Tacarigua	High	4	2.069225072	29	6
Tacarigua	High	2	1.572828524	37	7
Tacarigua	High	8	1.760888083	13	5
Tacarigua	High	8	2.555407473	34	5
Tacarigua	High	2	2.718165032	22	5
Tacarigua	High	4	2.119154343	15	3
Upper guanapo	Low	4	2.456856396	17	11
Upper guanapo	Low	2	2.223640571	17	7
Upper guanapo	Low	8	2.575939856	5	19
Upper guanapo	Low	4	2.802324619	11	2
Upper guanapo	Low	2	3.207924692	2	5
Upper guanapo	Low	8	2.990697794	18	4
Upper guanapo	Low	4	2.427399833	10	1
Upper guanapo	Low	8	2.461413217	5	9
Upper guanapo	Low	2	2.296951364	83	9
Upper guanapo	Low	4	3.193169179	8	4
Upper guanapo	Low	2	3.404552411	29	3
Upper guanapo	Low	8	3.069462298	5	3
Upper guanapo	Low	4	2.614935938	48	4
Upper guanapo	Low	2	2.367588002	51	9
Upper guanapo	Low	8	2.608871687	49	5
Upper guanapo	Low	8	3.240273885	10	9
Upper guanapo	Low	2	3.098656968	60	4
Upper guanapo	Low	4	3.126810182	39	6
Upper guanapo	Low	2	3.006535702	9	12
Upper guanapo	Low	8	2.823452865	7	4
Upper guanapo	Low	4	2.447884386	5	3
Upper guanapo	Low	4	2.225033105	37	8
Upper guanapo	Low	2	2.563805013	72	4
Upper guanapo	Low	8	2.517124507	14	3
Upper guanapo	Low	2	3.131943475	8	9
Upper guanapo	Low	4	3.268726806	54	2
Upper guanapo	Low	8	2.9951215	8	4
Upper guanapo	Low	2	2.340102508	11	7
Upper guanapo	Low	8	2.441684056	8	4
Upper guanapo	Low	4	2.439766153	2	7
Upper lopinot	Low	2	2.675517294	17	4
Upper lopinot	Low	8	2.756203692	13	3
Upper lopinot	Low	4	2.692310659	14	2
Upper lopinot	Low	4	3.165376802	7	2
Upper lopinot	Low	8	3.192585483	6	5
Upper lopinot	Low	2	3.406608465	29	3
Upper lopinot	Low	4	2.156887192	33	2
Upper lopinot	Low	2	2.216587936	20	2
Upper lopinot	Low	8	2.380113209	10	4
Upper lopinot	Low	4	3.156069782	17	4
Upper lopinot	Low	2	2.878274712	14	3
Upper lopinot	Low	8	2.901445701	10	5
Upper lopinot	Low	8	2.68448835	8	2
Upper lopinot	Low	4	2.575187092	27	2
Upper lopinot	Low	2	2.829884372	27	4
Upper lopinot	Low	2	3.592119906	21	8
Upper lopinot	Low	4	3.207696894	20	3
Upper lopinot	Low	8	3.192327784	11	9
Upper lopinot	Low	8	2.481337241	17	2
Upper lopinot	Low	4	2.623961653	11	4
Upper lopinot	Low	2	2.383685405	24	4
Upper lopinot	Low	8	2.809240936	16	6
Upper lopinot	Low	4	3.063835358	23	3
Upper lopinot	Low	2	2.985463843	6	2
Upper lopinot	Low	4	2.206662742	17	1
Upper lopinot	Low	2	2.21665086	8	2
Upper lopinot	Low	8	2.128352758	9	3
Upper lopinot	Low	4	2.578625111	18	3
Upper lopinot	Low	2	2.638258697	13	5
Upper lopinot	Low	8	2.566795925	19	3
Upper turure	Low	8	2.520884779	8	5
Upper turure	Low	2	2.546539931	11	13
Upper turure	Low	4	2.649458449	12	6
Upper turure	Low	8	2.81893997	10	6
Upper turure	Low	2	2.707211072	20	9
Upper turure	Low	4	2.731303243	6	3
Upper turure	Low	2	2.16388539	23	2
Upper turure	Low	4	2.632262211	16	6
Upper turure	Low	8	2.45403369	23	6
Upper turure	Low	2	3.117820689	19	42
Upper turure	Low	8	2.894334099	8	5
Upper turure	Low	4	3.106925846	17	8
Upper turure	Low	4	2.213109893	19	6
Upper turure	Low	2	2.029365361	9	7
Upper turure	Low	8	2.268923156	8	7
Upper turure	Low	2	2.940753159	15	4
Upper turure	Low	4	2.943134804	7	18
Upper turure	Low	8	2.958948558	6	4
Upper turure	Low	8	2.838038644	7	3
Upper turure	Low	4	3.362742858	26	6
Upper turure	Low	2	2.825039513	32	5
Upper turure	Low	8	2.311106594	6	3
Upper turure	Low	4	2.419456141	9	3
Upper turure	Low	2	2.407025744	5	5
Upper turure	Low	4	2.487584471	8	4
Upper turure	Low	2	2.363349452	2	4
Upper turure	Low	8	2.371085462	6	6
Upper turure	Low	4	2.780593062	9	5
Upper turure	Low	2	2.715063337	7	10
Upper turure	Low	8	2.852825703	7	5
